# Supplementary material for: One-step synthesis of nanohybrid carbon dots and TiO2 composites with enhanced ultraviolet light active photocatalysis
Source: Royal Society of Chemistry journal article supplement (doi:10.1039/c4ra14865g), 2014-12-23
Supplement: c4ra14865g1.pdf [file c4ra14865g1.pdf]

## One-step synthesis of nanohybrid CDs-TiO<sub>2</sub> composites with enhanced ultraviolet light active photocatalysis

Fan Li, Feng Tian,\* Changjun Liu, Zheng Wang, Zhenjie Du, Ruixin Li, Li Zhang

Institute of Medical Equipment, Academy of Military Medical Sciences, Tianjin 300161, PR  
China

TABLE S1: Crystalline characterization of different samples

| Sample | 2θ     | d <sup>a</sup> (nm) | FWHM  | CS <sup>b</sup> (nm) |
|--------|--------|---------------------|-------|----------------------|
| C-6    | 25.280 | 0.352               | 1.011 | 8.1                  |
| C-9    | 25.500 | 0.349               | 0.848 | 9.7                  |
| C-12   | 25.102 | 0.354               | 0.690 | 11.9                 |

<sup>a</sup> Determined by XRD using the Bragg equation. <sup>b</sup> Determined by XRD using the Scherrer equation.

The interplanar crystal spacing (*d*) and average crystallite sizes (*CS*) of the as-prepared C/TiO<sub>2</sub> samples are shown in Table 1, which were estimated using the Bragg equation ( I ) and Scherrer equation ( II ) as follows, respectively.

$$d = \frac{n \cdot \lambda}{2 \sin \theta} \quad \text{I}$$

$$CS = \frac{k \cdot \lambda}{FWHM \cdot \cos \theta} \quad \text{II}$$

Where FWHM is the half-height width of the diffraction peak of anatase or rutile, *k* = 0.89 is a coefficient, *θ* is the diffraction angle, and *λ* is the X-ray wavelength corresponding to the Cu K $\alpha$  radiation.

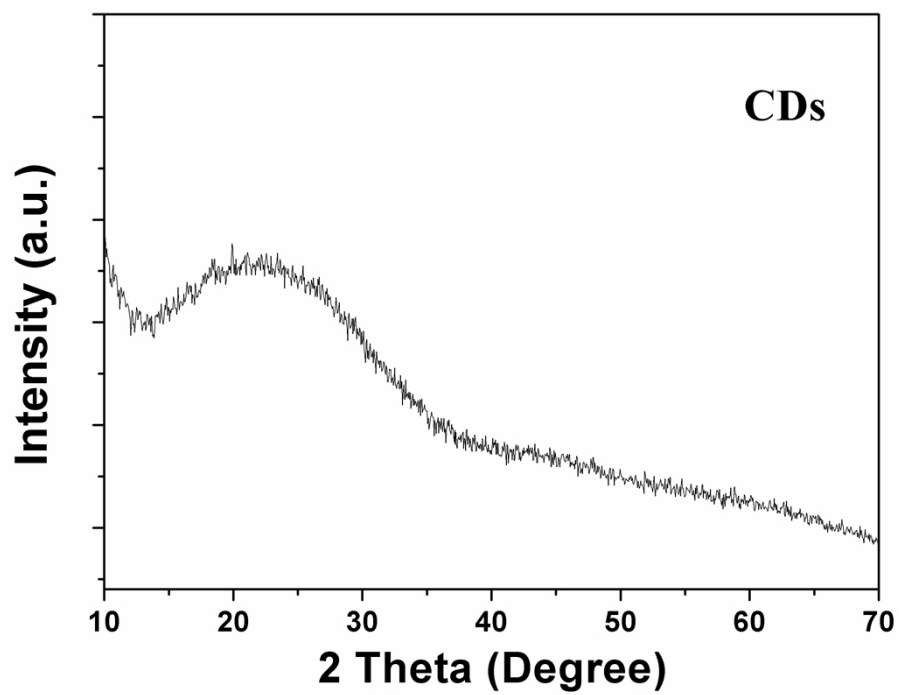

Fig. S1 XRD pattern of the as-prepared pure CDs.

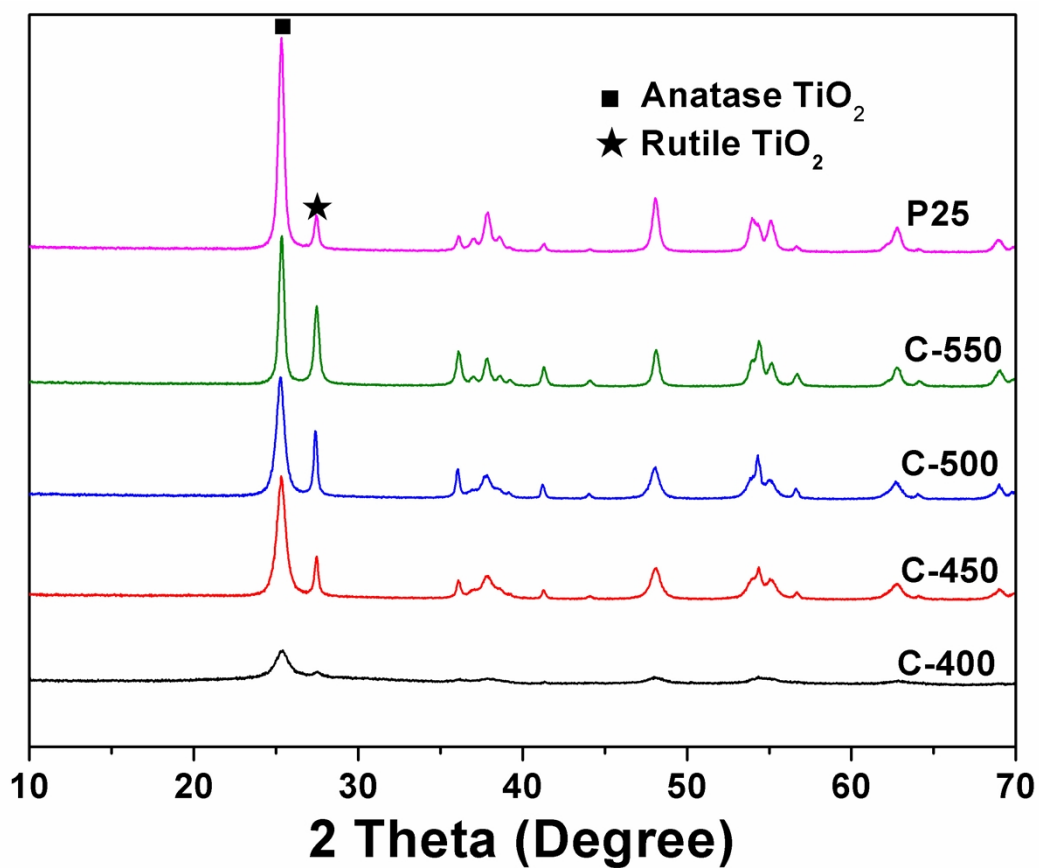

Fig. S2 XRD patterns of the commercial Degussa P25 and further annealed composites under different temperatures.

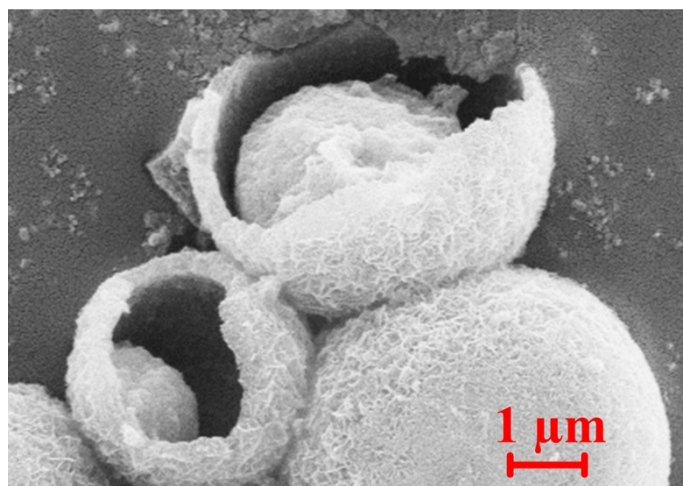

Fig. S3 SEM image of partial broken microspheres in sample C-12 (scale bar: 1  $\mu\text{m}$ ).

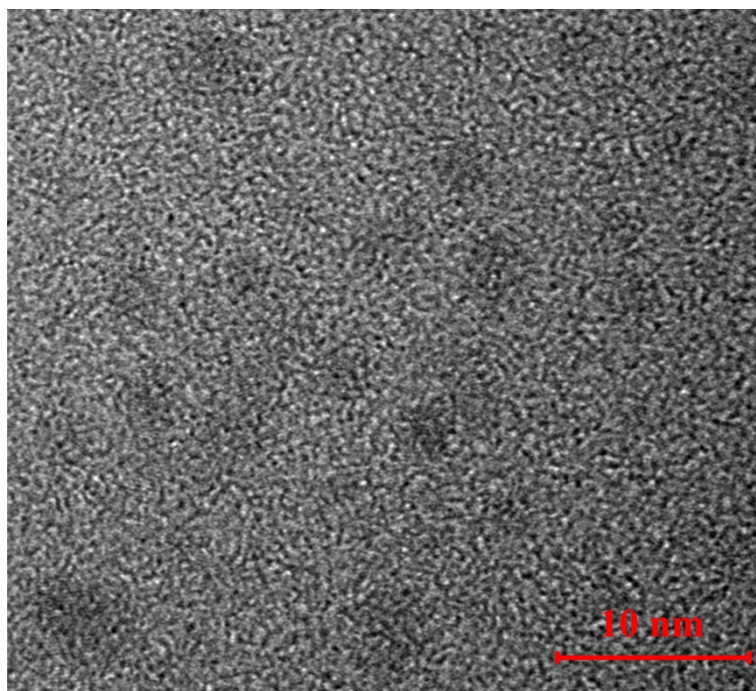

Fig. S4 HRTEM image of the as-prepared pure CDs (scale bar: 20 nm).

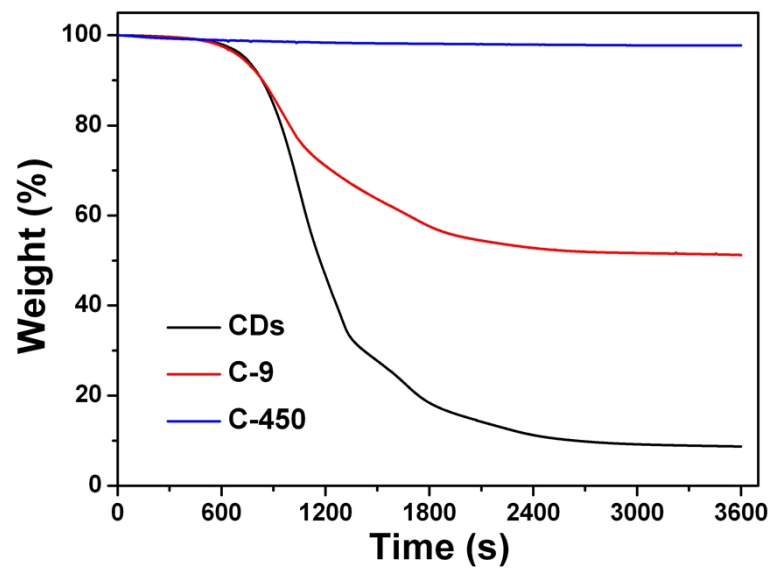

Fig. S5 Thermogravimetric curves of different samples from 50 °C to 650 °C under N<sub>2</sub> with a same heating rate (10 °C per min).

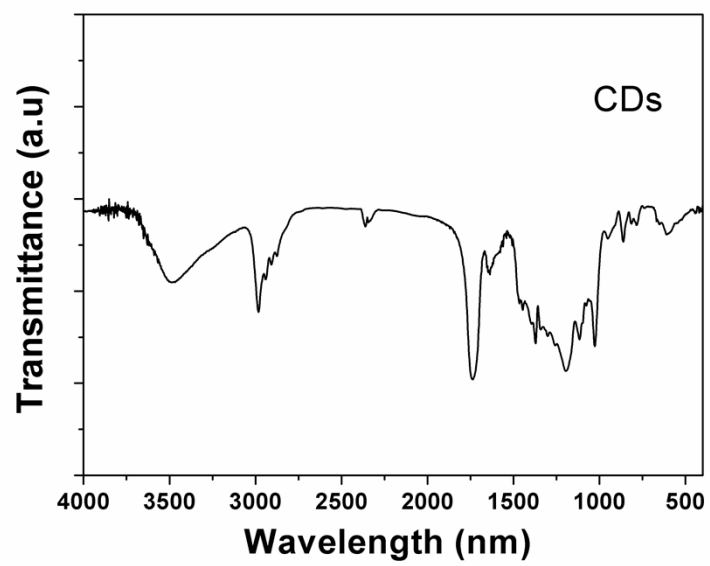

Fig. S6 FTIR spectrum of the as-prepared pure CDs.

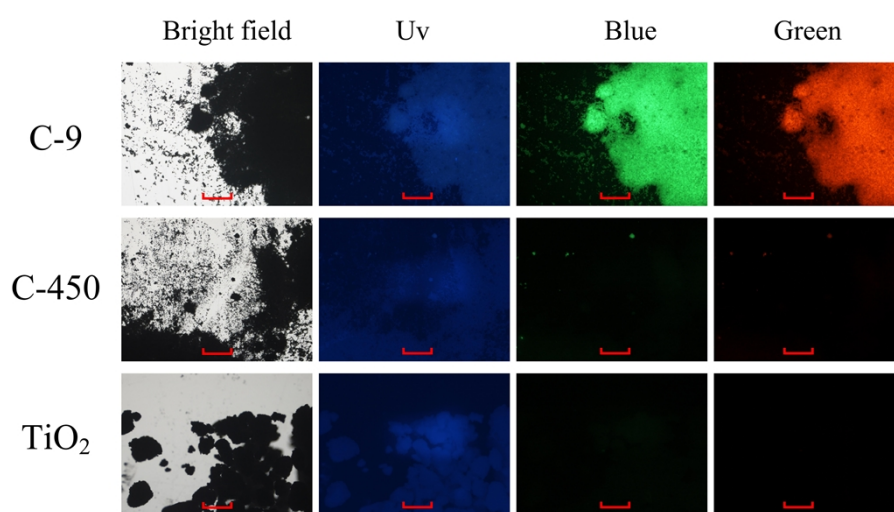

Fig. S7 Fluorescent microscopy images of C-9, C-450 and pure TiO<sub>2</sub> under the same photograph conditions.



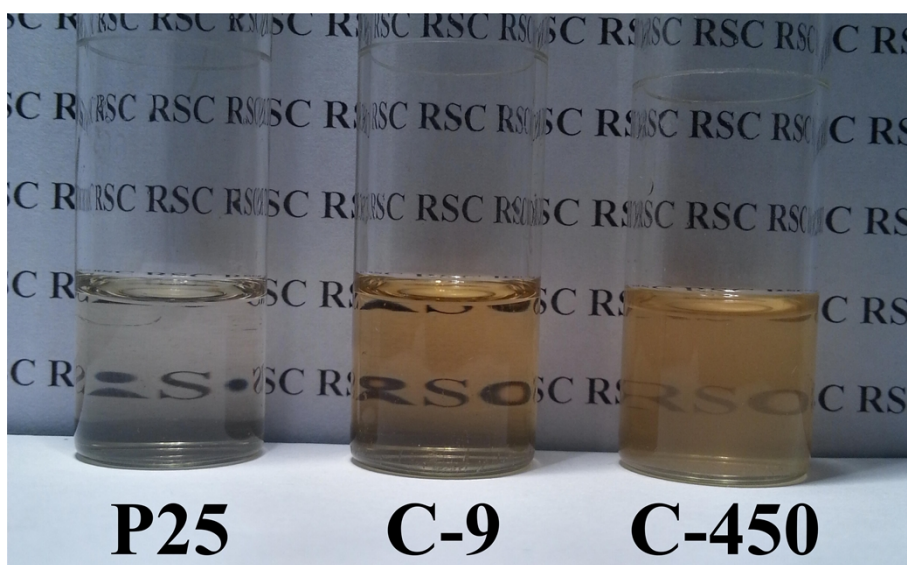

Fig. S8 Photographs of P25, C-9 and C-450 that dissolved in concentrated sulfuric acid under natural light.

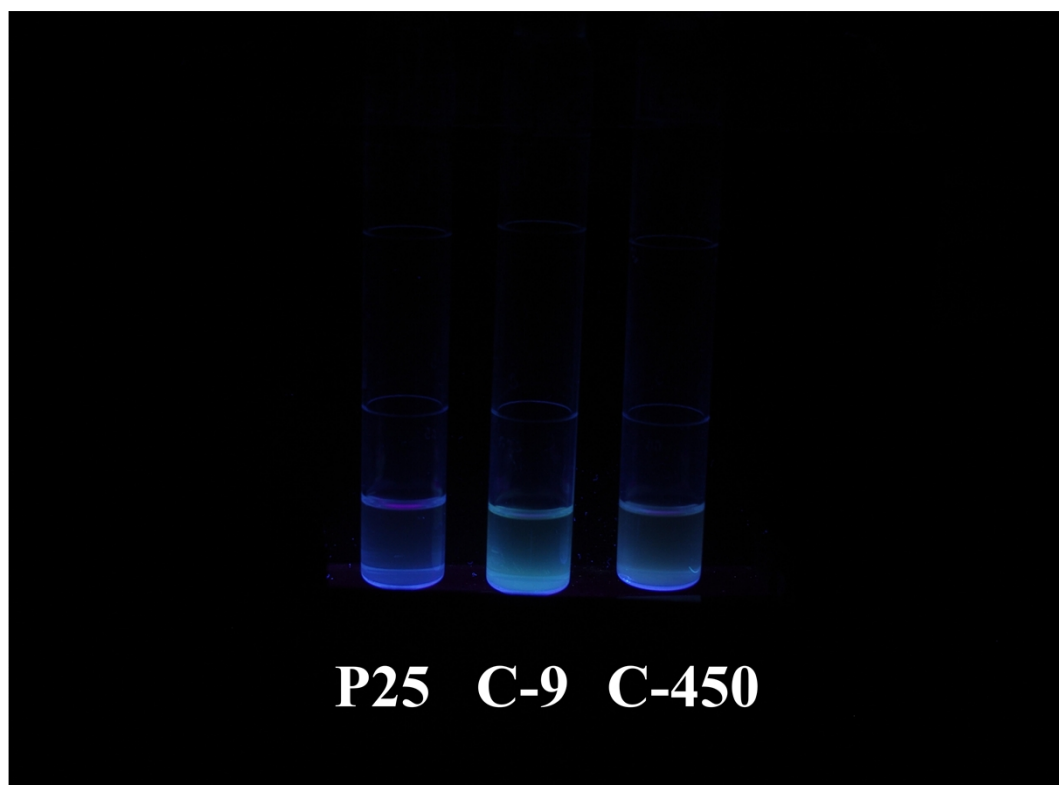

Fig. S9 Photographs of P25, C-9 and C-450 that dissolved in concentrated sulfuric acid under a UV lamp (365 nm).

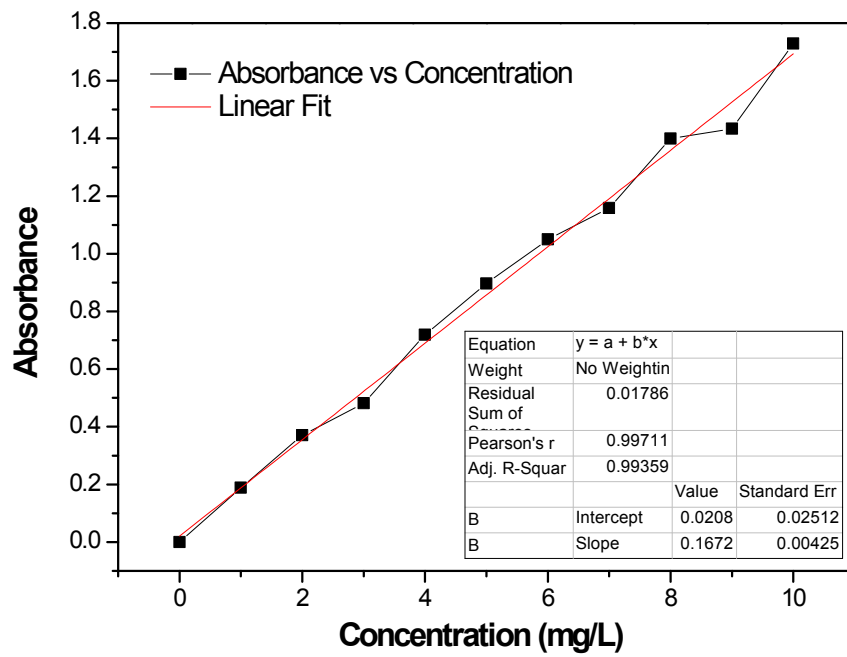

Fig. S10 UV-vis absorbency of the MB solution at 664 nm with different concentrations.

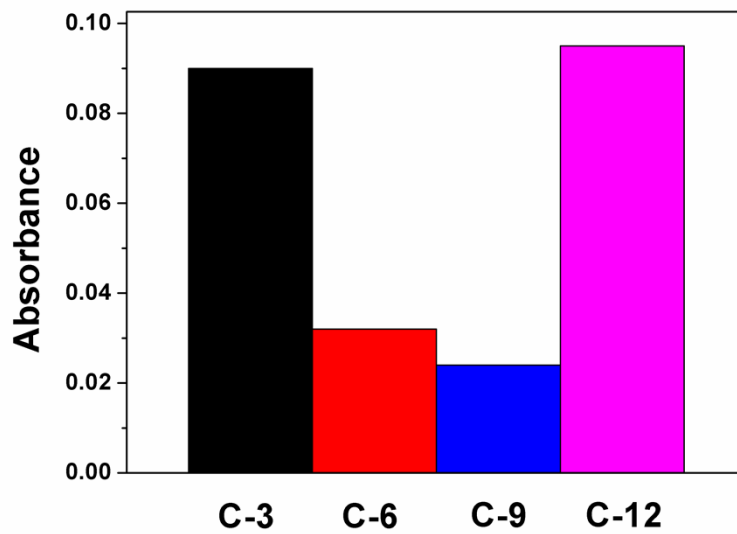

Fig. S11 UV-vis absorbance at 664 nm monitoring the photo-degradation efficiency of CDs-TiO<sub>2</sub> composites on MB after 10 min irradiation under UV light (254 nm).

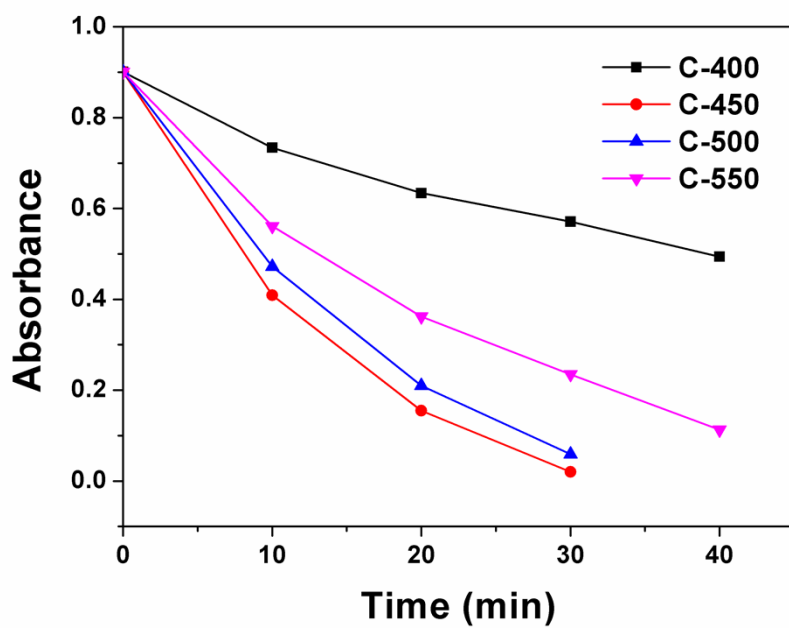

Fig. S12 UV-vis absorbance at 664 nm monitoring the photo-degradation efficiency of C-TiO<sub>2</sub> composites on MB at regular intervals under UV light (254 nm).

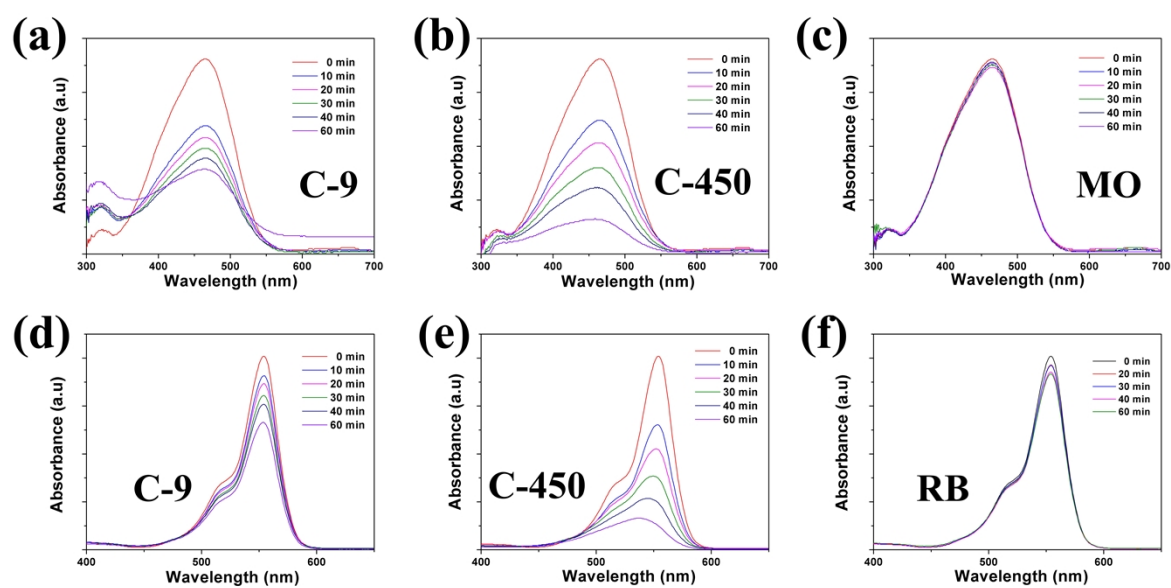

Fig. S13 UV-vis absorption spectra monitoring the degradation of MO (a, b and c) and RB (d, e and f): with C-9 as catalysts (a and d), with C-450 as catalysts (b and e) and without catalysts (c and f).

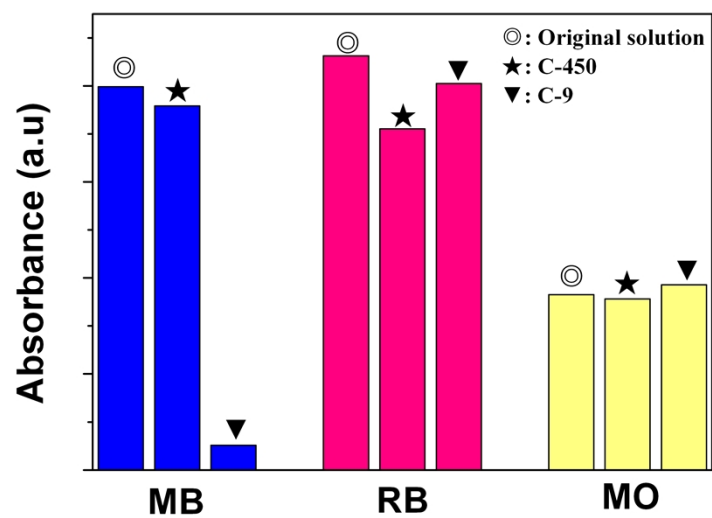

Fig. S14 Absorbance at 664 nm (MB), 554 nm (RB) and 462nm (MO) monitoring the absorption capacity of C-9 and C-450 upon the pollutants.

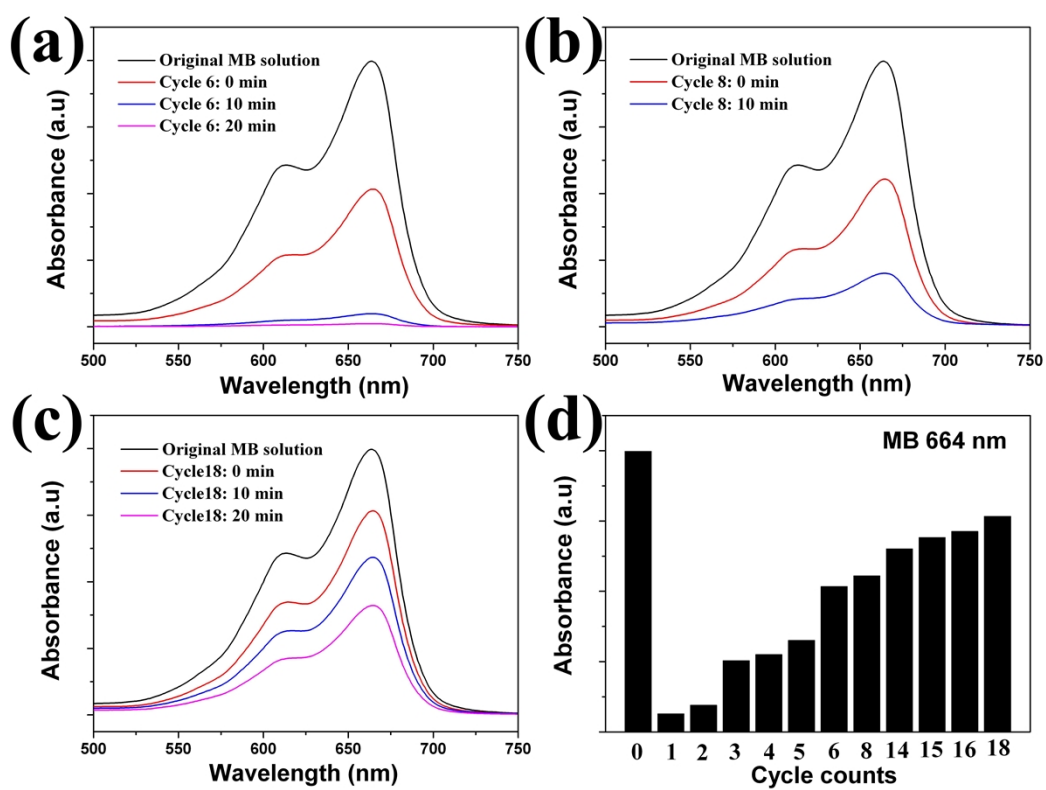

Fig. S15 UV-vis absorption spectra monitoring the degradation of MB (10 ppm) at different cycles using C-9 as the catalysts (a, b and c) and the absorbance at 664 nm monitoring the concentration of MB at the adsorption-desorption equilibrium of each cycle.
